# Supplementary material for: Inflammation leads to distinct populations of extracellular vesicles from microglia
Source: PubMed Central journal article supplement (PMC5972400; doi:10.1186/s12974-018-1204-7), 2018-05-28

**A****PHK76-EV****Bright Field / PHK76****Enlarged****Cells + No EV**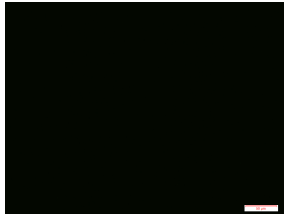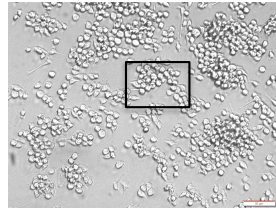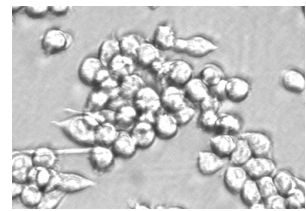**CTRL + EV**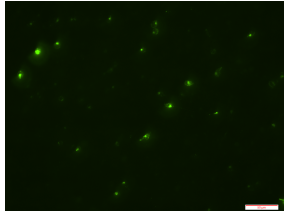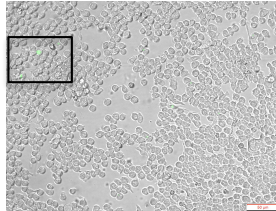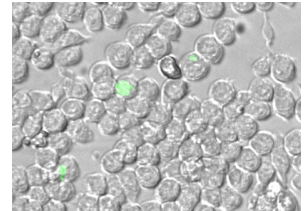**LPS + EV**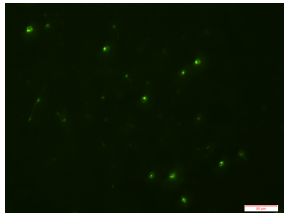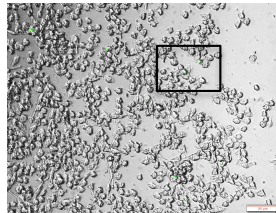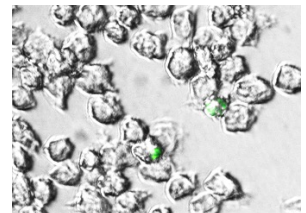**LPS  
+  
Etanercept  
+  
EV**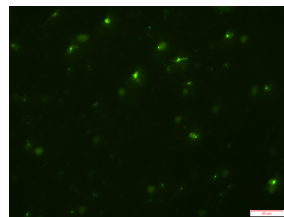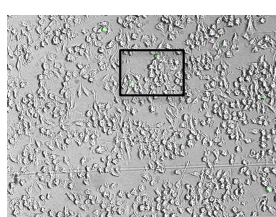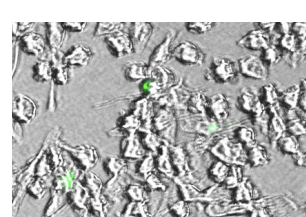**Etanercept + EV**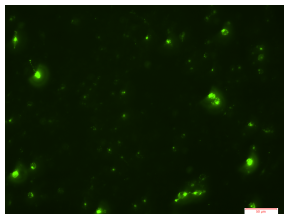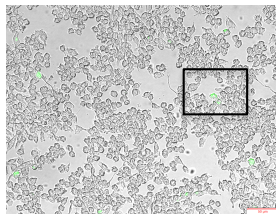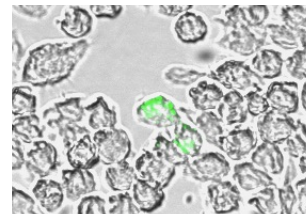**B**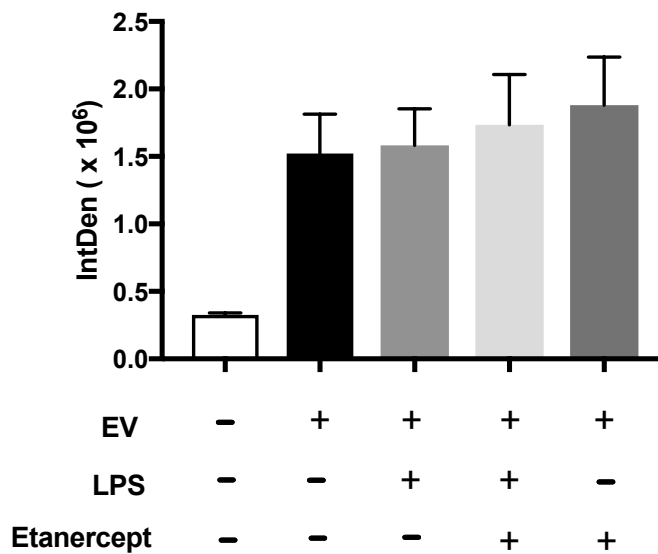

Supplement: 12974_2018_1204_MOESM3_ESM.pdf [file 12974_2018_1204_MOESM3_ESM.pdf]
