# Supplementary material for: Inflammation leads to distinct populations of extracellular vesicles from microglia
Source: PubMed Central journal article supplement (PMC5972400; doi:10.1186/s12974-018-1204-7), 2018-05-28

**Medium-TNF**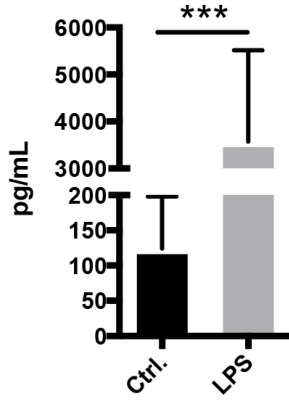**Medium-IFN $\gamma$** 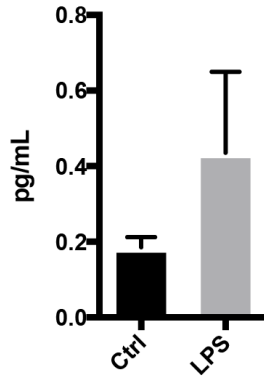**Medium-IL1 $\beta$** 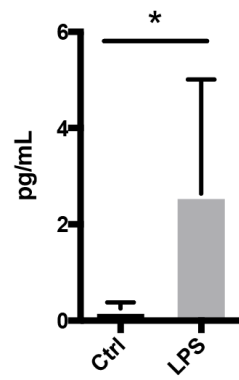**Medium-IL2**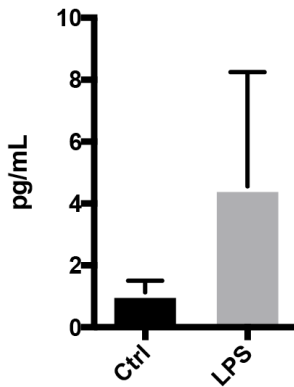**Medium-IL4**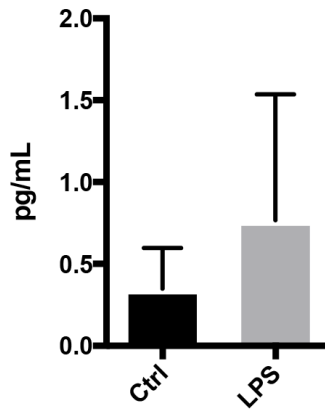**Medium-IL5**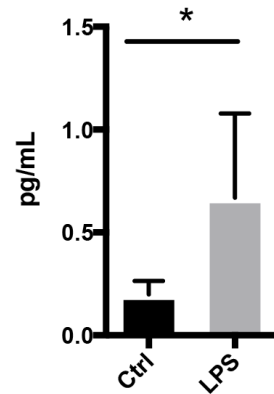**Medium-IL6**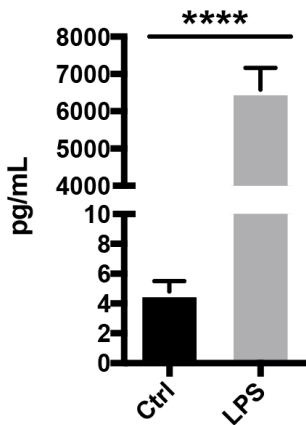**Medium-KC/GRO**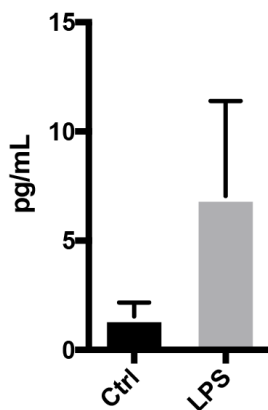**Medium-IL10**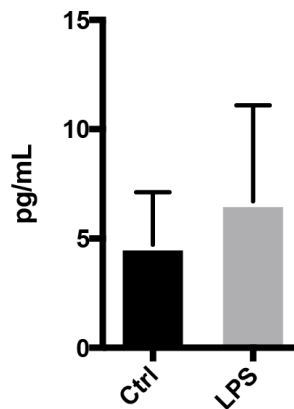**Medium-IL12p70**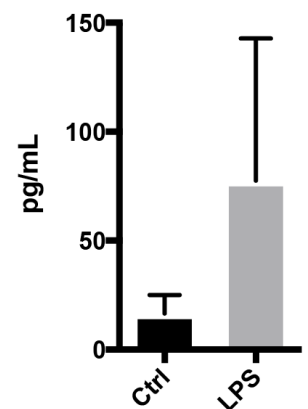

Supplement: 12974_2018_1204_MOESM1_ESM.pdf [file 12974_2018_1204_MOESM1_ESM.pdf]
