# Supplementary material for: Inflammation leads to distinct populations of extracellular vesicles from microglia
Source: PubMed Central journal article supplement (PMC5972400; doi:10.1186/s12974-018-1204-7), 2018-05-28

**EVs-IFN $\gamma$** 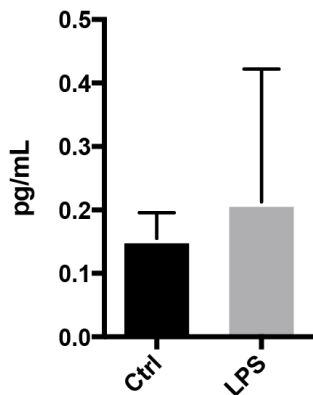**EVs-IL1 $\beta$** 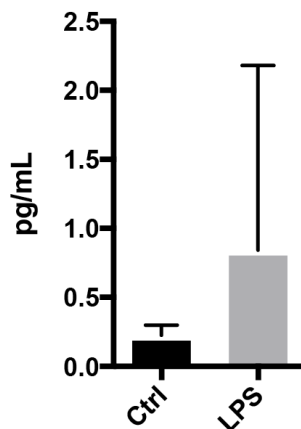**EVs-IL2**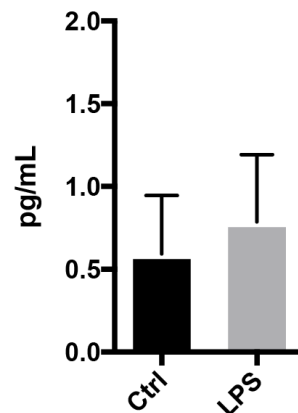**EVs-IL4**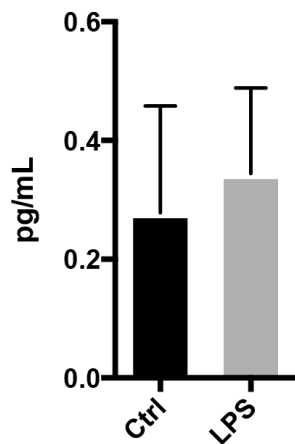**EVs-IL5**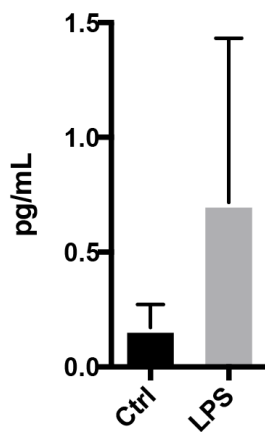**EVs-KC/GRO**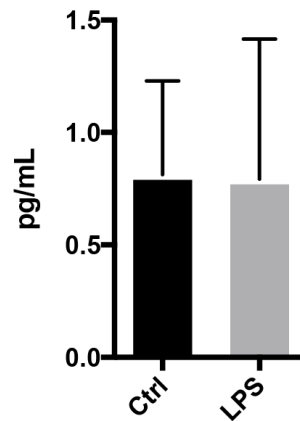**EVs-IL10**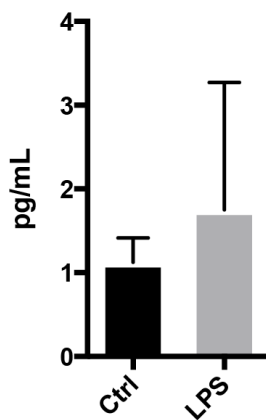**EVs-IL12p70**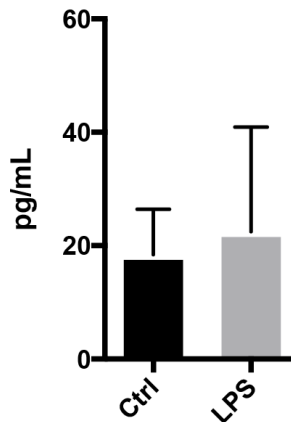

Supplement: 12974_2018_1204_MOESM2_ESM.pdf [file 12974_2018_1204_MOESM2_ESM.pdf]
