# Supplementary material for: Inflammation leads to distinct populations of extracellular vesicles from microglia
Source: PubMed Central journal article supplement (PMC5972400; doi:10.1186/s12974-018-1204-7), 2018-05-28

# 1 D after pMCAO

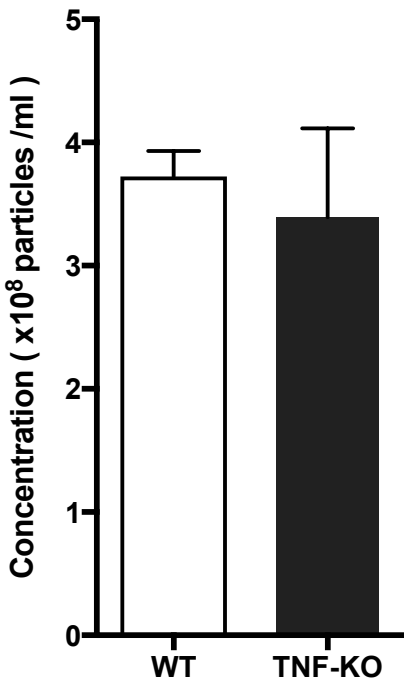

Supplement: 12974_2018_1204_MOESM5_ESM.pdf [file 12974_2018_1204_MOESM5_ESM.pdf]
